# Supplementary material for: Electrochemical properties and morphological evolution of pitaya-like Sb@C microspheres as high-performance anode for sodium ion batteries
Source: Royal Society of Chemistry journal article supplement (doi:10.1039/c4ta06086e), 2015-01-01
Supplement: c4ta06086e1.pdf [file c4ta06086e1.pdf]

Supplementary Material (ESI) for Journal of Materials Chemistry A

## Electrochemical Properties and Morphological Evolution of Pitaya-like Sb@C Microspheres as High-performance Anode for Sodium Ion Batteries

Lin Wu,<sup>a</sup> Haiyan Lu,<sup>a</sup> Lifen Xiao,<sup>b\*</sup> Xinping Ai,<sup>a</sup> Hanxi Yang,<sup>a</sup> and Yuliang Cao<sup>a\*</sup>

<sup>a</sup> Hubei Key Lab. of Electrochemical Power Sources, College of Chemistry and Molecular Sciences, Wuhan university, Wuhan 430072, China. Tel: 86-027-68754526; E-mail: ylcao@whu.edu.cn

<sup>b</sup> College of Chemistry, Central China Normal University, Wuhan 430079, China. E-mail: lfxiao@mail.ccnu.edu.cn

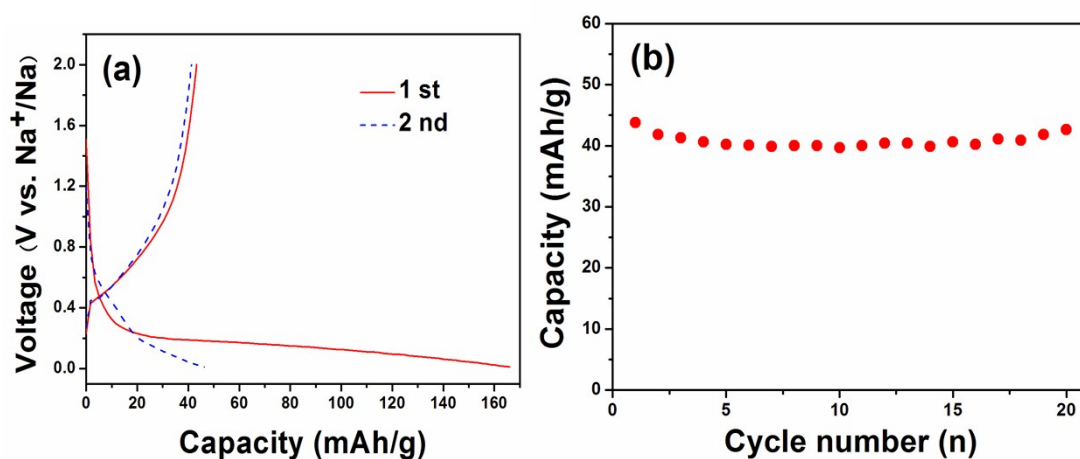

**Figure S1** (a) The initial two discharge/charge profiles of the pyrolyzed carbon electrode between 0.01 V and 2.0 V vs. Na<sup>+</sup>/Na at a current rate of 100 mA g<sup>-1</sup>; (b) Cycling performance of the pyrolyzed carbon electrode at a current rate of 100 mA g<sup>-1</sup>.

1.
